1 **Barriers influencing the care of survivors of gender-based violence in the**  
2 **context of forced displacement in Kaya, Burkina Faso: a qualitative study**

3 Souleymane BAYOULOU\*<sup>1</sup>, Patrice NGANGUE\*<sup>2,5</sup>, Soutongnoma Safiata KABORÉ<sup>2,3,4</sup>, Boris  
4 Arnaud Kouomogne NTEUNGUE<sup>6,7</sup>, Yacouba PAFADNAM<sup>8</sup>, Danièle Sandra YOPA<sup>9</sup>, Josiane  
5 Seu<sup>5</sup>, Gbètego Maxime KIKI<sup>10</sup>

6 <sup>1</sup>United Nations Population Fund (UNFPA), Burkina Faso office.

7 <sup>2</sup>Institut de Formation et de Recherche Interdisciplinaires en Sciences de la Santé et de  
8 l'Éducation, Ouagadougou, Burkina Faso.

9 <sup>3</sup>Université Nazi BONI, Bobo Dioulasso, Burkina Faso.

10 <sup>4</sup>Institut National de Santé Publique, Ouagadougou, Burkina Faso.

11 <sup>5</sup>Faculty of Nursing, Université Laval, Québec, Canada.

12 <sup>6</sup>School of Public Health, Texila American University, University of Central Nicaragua.

13 <sup>7</sup>World Health Organization, Cameroon Country Office, Yaounde, Cameroon.

14 <sup>8</sup>Ecole Nationale de Santé Publique de Ouahigouya.

15 <sup>9</sup>Faculty of Medicine and Biomedical Sciences, University of Yaoundé 1.

16 <sup>10</sup>Centre Interdisciplinaire de Recherche en Réadaptation et Inclusion Sociale (CIRIS), Quebec.

17 **Corresponding author\*:**

18 Souleymane BAYOULOU,

19 **Email:** [bayoulou.solo@gmail.com](mailto:bayoulou.solo@gmail.com)

20 **ABSTRACT**

21 Gender-based violence (GBV) is a serious international health problem that challenges  
22 fundamental human rights. In addition to violating fundamental rights, it is an attack on the  
23 principles of gender equality. GBV is exacerbated in situations of conflict and forced  
24 displacement because of the vulnerability it engenders, particularly among women and children.  
25 Therefore, caring for victims of GBV in the context of a humanitarian crisis is special because of  
26 the specific nature of the context itself. This study aimed to explore the factors that negatively  
27 influence the care of survivors of GBV in the context of forced displacement. This was a  
28 descriptive and analytical-qualitative study. A total of 26 participants participated in the  
29 individual interviews. Most participants were healthcare workers (53,8%). The findings show that  
30 barriers to care are sociocultural (fear of stigmatization, ignorance of the benefits of seeking  
31 appropriate care and support, self-censorship among GBV survivors, fear or risk of reprisal,  
32 honor denied, fear of the aggressor punishment, shame and fear of being repudiated), institutional  
33 (lack of qualified human resources to care for GBV survivors, insufficient information on the  
34 availability of care services, geographical inaccessibility of care services, lack of confidentiality  
35 from service providers, inadequate health care and support systems, low availability of care  
36 services, poor quality of care) and financial. Bringing all care services together in one place, such  
37 as a one-stop center, is imperative to overcome these obstacles. In this way, it will be possible to  
38 improve accessibility to services and enhance the quality of care through effective coordination.

39 **Keywords:** Gender-based violence, Survivors, Internal displacement, Care, Humanitarian  
40 **context, Intersectionality.**

## 41 INTRODUCTION

42 At the end of 2022, 108.4 million people worldwide were forcibly displaced from their home  
43 countries or towns, leading to a significant amount of 35.3 million refugees, 76% of whom were  
44 hosted in low- and middle-income countries [1]. Forced population movements exacerbate the  
45 risk of gender-based violence (GBV) [2].

46 GBV refers to any harmful action taken against an individual or group because of their gender  
47 identity [3]. It is a serious international health problem that questions fundamental human rights.  
48 In addition to violating fundamental rights, it is an attack on the principles of gender equality [4].  
49 It is, therefore, a violation of human rights and affects not only the people who are its direct  
50 victims but also society as a whole [5].

51 GBV remains one of the world's most widespread scourges, and its impact is far-reaching [6].  
52 However, it is important to note that, as a general rule, the number of people who have reported  
53 acts of GBV, but not the number of people who have experienced it, is known [7]. In other  
54 words, the prevalence of GBV is extremely difficult to determine, as the concealment of many  
55 cases leads to underreporting. In contrast, it has been established that GBV is a widespread  
56 problem concerning human rights and public health [7].

57 Individuals can experience GBV, including men, boys and sexual and gender minorities [8]. It is  
58 a universal phenomenon and involves multisectoral management [6]. Nevertheless, women and  
59 girls are disproportionately affected [8]. Their status as women and girls in this crisis context  
60 increases their vulnerability and exposes them to these harmful practices [9]. Unfortunately,  
61 emergencies increase the risk of violence, exploitation and abuse [10]. Indeed, in the context of a  
62 crisis, due to a lack of resources, capacity and political will, women are more exposed to sexual  
63 and gender-based violence (SGBV) [5].

64 Burkina Faso (BF) has faced political, security and humanitarian crises since 2015. According to  
65 National Emergency and Rehabilitation Council (CONSUR) data, nearly two million people have  
66 been forcibly displaced to save their lives [2]. This situation is more marked in the Centre-Nord  
67 region, where thousands of people are forced to flee their homes [12]. According to the latest  
68 CONASUR statistics released on March 31, 2023, the Centre-Nord region has 493,945 internally  
69 displaced persons (IDPs), mostly women and children [13].

70 According to the GBV subcluster report, 2,393 cases of GBV were reported in 2022, compared  
71 with 1,197 cases in 2021[14]. At the same time, BF is witnessing a reduction in humanitarian  
72 space, with a profound malfunctioning of essential social services with access limitations for the  
73 most vulnerable categories of the population, including women, children, people with disabilities  
74 and older people [15]. All these situations are GBV multipliers and have a major impact on the  
75 sexual and reproductive health (SRH) of women and girls [16].

76 Humanitarian actors stress the need to provide urgent assistance to survivors of sexual and  
77 gender-based violence to ensure their protection and treatment and to avoid the discrimination  
78 they still face [17]. In parallel with this humanitarian crisis, cases of gender-based violence  
79 (GBV) have multiplied, with health, social, psychological and economic consequences [15].  
80 Gender-based violence is a serious international health problem that challenges fundamental  
81 human rights. In addition to violating basic human rights, it undermines the principles of equality  
82 between men and women [4].

83 This study explored factors that negatively influence GBV survivors' use of care among IDPs in  
84 the Centre-Nord region of Burkina Faso.

## 85 **METHODS**

### 86 **Study design**

87 We conducted a qualitative, holistic, and analytical case study to analyze the care use of IDPs.

## 88 **Study population**

89 The study population is composed of three (03) target groups: (i) GBV survivors, (ii)  
90 professionals involved in the management of GBV survivors (health workers, psychologists, case  
91 managers and criminal investigation officers), and (iii) coordinators of management services.

## 92 **Inclusion criteria GBV survivors**

93 To be included in the study, participants had to be IDP living in Kaya, survivor of GBV who  
94 received care and were present in Kaya at the time of the study.

## 95 **Sampling**

96 We conducted stratified random selection to ensure that diversity could be found within the  
97 sample. Our sample was distributed as follows:

98 - 11 survivors of GBV: For this target group, we considered all GBV survivors who had received  
99 care and had given their free and informed consent to be interviewed.

100 Twenty-six people were involved in the psychological, medical and legal care of GBV survivors.  
101 They come from the care services in the zones to welcome displaced persons. They include  
102 health workers, psychologists, social workers, case managers and Judicial Police Officers (OPJ).  
103 - two coordinators of care services.

## 104 **Data collection methods, techniques and tools**

105 Two techniques were used to collect the data: individual interviews and document review. The  
106 semi-structured interview guide for each group of participants was deployed on smartphones  
107 using a Kobotoolbox. Individual interviews were conducted in the services concerned. All open-  
108 ended questions were systematically audio recorded using the KoboCollect tool, with the  
109 interviewees' consent. Each interview lasted an hour on average. The interview guides were

110 tested under real-life conditions to verify their validity and reliability and assess their relevance  
111 and average completion time before validation and corrections were made. Three pairs of trained  
112 and experienced interviewers conducted the interviews. The training was practical in enabling  
113 participants to familiarize themselves with the KoboCollect tool and, above all, to gain a shared  
114 understanding of the questionnaire in the local language spoken by internally displaced persons  
115 (IDPs).

## 116 **Data analysis**

117 Sociodemographic characteristics from individual interviews with care providers were coded in  
118 Microsoft Excel and analyzed using the Statistical Package for the Social Sciences software SPSS  
119 version 25, SPSS Inc. Armonk, NY: IBM Corp.

120 We opted for the qualitative thematic analysis proposed by Braun and Clarke (2006), an inductive  
121 approach to identify and analyze themes emerging from the participants' entire discourse [18].  
122 Unlike other approaches, it does not impose predetermined categories based on a theoretical  
123 framework [19]. Consequently, we did not pre-categorize the responses [20]. To carry out the  
124 analysis, we followed the six steps described by Braun and Clarke as follows (1) free coding ; (2)  
125 classification of meaning units ; (3) creation of categories and subcategories ; (4) theme  
126 development ; (5) theme mapping ; (6) presentation of results.

127

## 128 **Ethical considerations**

129 The Burkina Faso Health Research Ethics Committee approved the study protocol under number  
130 2022-01-012 on January 17, 2022. All participants were informed of the study's objectives and  
131 the possibility of withdrawing from the study at any time without prejudice. The purpose of the  
132 audio recording was also clearly explained to them in the local language. Additionally, each

133 participant provided informed consent before the interview with the assurance that their answers  
 134 were anonymized for confidentiality purposes. Moreover, the tools used did not allow direct  
 135 identification of study participants.

136 **RESULTS**

137 A total of 26 participants participated in the individual interviews. Most participants were  
 138 healthcare workers (53,8%), as shown in Table 1 below with more details.

139 **Table 1. Sociodemographic characteristics of GBV care providers in Kaya, Burkina-Faso**  
 140 **(n=26)**

|                                     | <b>Individual<br/>interviews with<br/>Healthcare<br/>workers (n=14)</b> | <b>Personal<br/>interviews<br/>with<br/>GC (n=5)</b> | <b>Personal<br/>interviews<br/>OPJ (n=2)</b> | <b>Personal<br/>interviews<br/>with<br/>Psychologists<br/>(n=5)</b> |
|-------------------------------------|-------------------------------------------------------------------------|------------------------------------------------------|----------------------------------------------|---------------------------------------------------------------------|
| <b>Gender</b>                       |                                                                         |                                                      |                                              |                                                                     |
| Men (n,%)                           | 3 (21.4)                                                                | 5 (100)                                              | 1 (50)                                       | 1 (20)                                                              |
| Women (n,%)                         | 11 (78.6)                                                               | 0                                                    | 1 (50)                                       | 4 (80)                                                              |
| <b>Qualification</b>                |                                                                         |                                                      |                                              |                                                                     |
| SFE (n,%)                           | 11 (78.6)                                                               |                                                      |                                              |                                                                     |
| IDE (n,%)                           | 3 (21.4)                                                                |                                                      |                                              |                                                                     |
| <b>Years of experience (range)</b>  |                                                                         |                                                      |                                              |                                                                     |
| 1-5 ans (n,%)                       | 5 (35.7)                                                                | 5 (100)                                              | 1 (50)                                       | 5 (100)                                                             |
| ≥5ans (n,%)                         | 9 (64.3)                                                                | 0                                                    | 1 (50)                                       | 0                                                                   |
| <b>Long length at posts (range)</b> |                                                                         |                                                      |                                              |                                                                     |
| <1 an (n,%)                         |                                                                         | 1 (20)                                               | 0                                            | 1 (20)                                                              |

|              |        |         |        |
|--------------|--------|---------|--------|
| 1-3ans (n,%) | 2 (40) | 0       | 4 (80) |
| ≥3ans (n,%)  | 2 (40) | 2 (100) | 0      |

---

141 Victims need holistic and appropriate care to rebuild their lives. However, there are often barriers  
142 that prevent survivors from accessing intake services. The results of the study highlighted three  
143 types of barriers: (i) sociocultural barriers, (ii) institutional barriers and (iii) financial barriers.

#### 144 **Sociocultural barriers**

145 The results of the study show that the main sociocultural barriers are as follows:

##### 146 ☞ *Fear of stigmatization*

147 Individual interviews with care providers also showed that the fear of being stigmatized is a real  
148 barrier to care: "...stigmatization, rejection, shame, the way society looks at them can be reasons  
149 for a survivor not to want to report GBV" (Individual interview with psychologist 2). Indeed,  
150 some survivors are afraid of being stigmatized by reporting their GBV situation to care services.  
151 They are so scared of not being understood and of being marginalized.

152 We also note that more than most care providers (16/26) believe that women are responsible for  
153 the violence they experience due to their behavior. Additionally, almost half (12/26) believe that  
154 the victims of GBV do not consider injuries inflicted by their husbands to be GBV. In other  
155 words, survivors often suffer double violence. They are sentenced without trial. This is a clear  
156 example of how to reinforce victims' conviction that there is no point in seeking help from these  
157 services. In many cases, acts of GBV are perceived as part of the socialization process and are  
158 therefore encouraged by society, so much so that laws to combat GBV are seen as a breach of the  
159 social fabric. Even those who are supposed to take action to eliminate GBV are involved in  
160 spreading preconceived and misleading ideas.

##### 161 ☞ *Ignoring the benefits of seeking appropriate care and support*



162 Some survivors are unaware of their rights: "*Others do not know that after a rape, you have to go*  
163 *to a health center*" (Individual interview, health agent 12). They suffer from GBV without  
164 knowing that their rights are being violated: "*Some people are victims of GBV, but they do not*  
165 *know that it is GBV. Take the example of a woman who lives with her husband and who forces*  
166 *her to have sex at any time, even though she is not consenting at the time. She may not know this*  
167 *is GBV*" (Individual interview, case manager 3).

168 Under these conditions, they take no initiative to escape the cycle of violence, let alone seek help  
169 for appropriate care. The study also revealed that the vast majority of GBV survivors have no  
170 formal education. This state of affairs could exacerbate their vulnerability and contribute to  
171 keeping them in the cycle of violence.

172 Similarly, half of the stakeholders (13/26) believe that unequal relations between men and  
173 women are not risk factors for gender-based violence.

#### 174 ☞ ***Self-censorship among GBV survivors***

175 Some survivors believe that they are responsible for their misfortune: "*One obstacle is that GBV*  
176 *survivors tell themselves that there is no longer any possibility of someone helping them to*  
177 *overcome what happened to them because the past act is now part of their lives. It is a form of*  
178 *resignation*" (Individual interview with Psychologist 1). This situation plunges them into absolute  
179 silence because they are convinced there is no way to help them in the face of the evidence they  
180 are going through. For them, the past is now part of their lives, and they will have to live with it  
181 in their consciences. This kind of resignation is a real obstacle to taking charge of their lives.

#### 182 ☞ ***Fear or risk of reprisal***

183 Very often, the aggressor lives in the victim's family environment. This may be an intimate  
184 partner, a care provider, a family member, or an acquaintance. Given the perpetrator's social

185 status, this proximity can hinder reporting. She may also be pressured, threatened or killed by her  
186 attacker to avoid humiliation. In such cases, the survivor prefers to keep herself secret and suffer  
187 martyrdom: *"A survivor may not report her GBV because if the person who assaulted her is*  
188 *someone close to her, an acquaintance, a relative, she will be afraid that by reporting this*  
189 *violence to the authorities, she may be marginalized"* (Individual Interview Case Manager 4).

#### 190 ☞ ***Honor denied***

191 According to healthcare providers, survivors are often afraid that their honor will be trampled  
192 after they report GBV: *"Then, they think that their honor has been trampled"* (individual  
193 *interview with healthcare provider 11*). As a result, they prefer not to report GBV, which is a  
194 barrier to care.

#### 195 ☞ ***Fear of the aggressor's punishment***

196 In many situations, women survivors of GBV resign themselves to enduring the violence because  
197 they want to protect their tormentor: *"A woman who her partner beats, if she reports it to the*  
198 *police, they will go straight to extreme punishment, even imprisoning the husband"* (Individual  
199 *interview, case manager 1*). Indeed, in situations of intimate partner violence, survivors, for fear  
200 of seeing their spouse in prison, simply decide not to talk about it and to suffer in silence.

#### 201 ☞ ***Shame***

202 In some cases, such as incest, victims feel obliged to remain quiet to avoid shame: *"The main*  
203 *reason for me is to feel this sense of shame after having been subjected to such a situation"*  
204 *(Psychologist 3, individual interview)*. These kinds of abominations are not always disclosed to  
205 protect the family from marginalization; for example, *"I take the case of incest; someone who has*  
206 *slept with his daughter or the brother who has slept with his sister or with a family member.*  
207 *These kinds of cases can never be disclosed because the family will never accept them, and they*

208 *will stay between them. Unless there's a case of illness or pregnancy, and now, they often use our*  
209 *service a little clandestinely to help them find a solution" (Individual interview, case manager 5).*

### 210 ☞ ***Fear of being repudiated***

211 In cases of intimate partner violence, many victims resign themselves to speaking out to avoid  
212 repudiation: *"Women who live in couples, even if they are mistreated, do not like to complain*  
213 *because the husband may now decide to expel her, so they put up with it." Individual interviews*  
214 *with case managers 5. "Some women, because of their children, are afraid of being repudiated by*  
215 *their husbands" (Individual interview with Judicial Police Officer 1). Unfortunately, tragedies*  
216 *also occur under these conditions.*

### 217 **Institutional barriers**

218 The results of the study identified eight (n=08) types of institutional barriers to the care of GBV  
219 survivors:

### 220 ☞ ***Lack of qualified human resources to care for GBV survivors***

221 Care providers' technical and operational capacities are weak: *"The difficulty of finding*  
222 *specialized human resources to ensure adequate care is genuine" (MCD individual interview).*

223 The study revealed that some care providers are unfamiliar with the conditions of care, the  
224 chronology of treatment, and the deadline for administering postexposure prophylaxis (PEP) and  
225 emergency contraception in the event of rape. As a result, some health workers are reluctant to  
226 take on cases of rape because they do not know exactly what to do: *"Some health workers are*  
227 *afraid to take on cases of GBV because they are not trained" (Interview with an individual health*  
228 *worker).*

229 For example, the vast majority of health agents interviewed (10/14) believe that it is mandatory to  
230 examine the victims of sexual violence before administering treatment. Of the 14 health workers

231 interviewed, not one was able to list in chronological order the priorities for treatment in cases of  
232 rape. Slightly more than one-third (5/14) of health workers thought knowing the victim's  
233 serological status before administering postexposure prophylaxis (PEP) was essential. Nearly half  
234 (6/14) of health workers are unaware that the maximum time limit for administering PEP is 72  
235 hours.

236 More than half (10/14) of the health workers interviewed were unaware that the maximum time  
237 limit for administering emergency contraception (EC) was five (5) days. In addition, almost half  
238 (6/14) of the mothers did not know other nonsurgical methods to avoid pregnancy after sexual  
239 violence when emergency contraceptive pills were unavailable. Most health workers (9/14)  
240 believe that the primary purpose of physical examination is to determine with certainty whether  
241 rape has occurred or to determine whether prophylaxis for sexually transmitted infections (STIs)  
242 is necessary rather than to assess and document injuries.

243 Regarding capacity building, one-third of care providers have never been trained on a topic  
244 related to GBV. Most of the players interviewed were unaware of the guidelines for the  
245 management of GBV survivors. According to the majority (15/26), the minimum response in the  
246 safe care of the survivor is to stop the violence immediately rather than to guarantee the victim's  
247 safety and security. In addition, almost half (12/26) believe that suicide-related issues should not  
248 be discussed with GBV survivors. In addition, more than half (15/26) feel the victim must tell her  
249 story before being treated. In addition, one-third of those involved (9/26) believed that the  
250 victim's informed consent should be sought during the treatment. However, it should be noted  
251 that all care providers are unanimous in saying that survivors must receive fair and equitable  
252 treatment, regardless of their ethnic origin, religion, nationality or sexual orientation.

253 ☞ *Insufficient information on the availability of care services*

254 There is a lack of awareness of existing care services due to a lack of communication: "*The fact*  
255 *that there are not many broadcasts or talks on the subject means that people are not informed*"  
256 (*Individual interview, case manager 3*).

257 Indeed, there are very few radio broadcasts and other awareness-raising activities organized by  
258 care services to orient and enlighten the population: "*If they are not informed that these*  
259 *structures exist, they will stay at home with their problem*" (*Individual interview, case manager*  
260 *4*). Thus, the lack of information is often the cause of the ignorance of many people, who do not  
261 even know that they are victims of human rights violations. The study also revealed that even  
262 within the same department, not all players are at the same level of information. For example,  
263 some actors (2/26) had no information on the existing referral circuit. This lack of information  
264 can lead to delays in referral and, consequently, negatively impact the quality of care. Moreover,  
265 most survivors felt they had not received information on available services and options. One-third  
266 of the survivors thought they had not received a referral, even though the service was unavailable  
267 locally.

#### 268 ☞ ***Geographical inaccessibility of care services***

269 The study showed that even when the service is available, survivors are not always aware of its  
270 geographical location: "*It also depends on the location of the service. If the service is not well*  
271 *located, the person risks exposing himself to the view of his community because some victims may*  
272 *think that everyone sees them when they enter the service*" (*Individual interview, case manager*  
273 *2*). It also emerges that there is a problem of geographical accessibility because the areas where  
274 internally displaced persons (IDPs) congregate are in the outlying districts, whereas the services  
275 are more centrally located: "*There are geographical obstacles; this means that the person is in a*  
276 *corner that is far from the health facility; he often has to cross low-lying areas where there is*

277 *insecurity" (Individual interview with health agent 10). Indeed, more than one-third of the*  
278 *survivors interviewed (4/11) indicated that the services are difficult to find. On the other hand, all*  
279 *the survivors felt that the opening hours of the services enabled them to access them without*  
280 *difficulty or constraints.*

281 ☞ ***Lack of confidentiality from service providers***

282 Care providers have indicated that one of the barriers to care is the lack of ethics and deontology  
283 on the part of certain care providers: *"There is also the very credibility of the service; the agents*  
284 *who work in the service must know how to demonstrate ethics and deontology, respect for the*  
285 *victim's dignity" (Individual Interview Case Manager 2). "In my opinion, there's also the*  
286 *judgment passed on the care services, which is considered unsafe for her and the lack of trust*  
287 *toward the care providers (Individual Interview Psychologist 1). Unfortunately, some staff may*  
288 *go so far as to betray professional secrecy out of sheer thoughtlessness. Prejudices about those*  
289 *involved in the care process are also seen as a further obstacle to requesting services: "I think*  
290 *many people are afraid to approach us because they're simply prejudiced against women who*  
291 *wear the uniform" (Individual Interview Police Officer 1).*

292 ☞ ***Inadequate health care and support systems***

293 Direct observation has shown that almost all health care services do not have a suitable setting for  
294 receiving GBV survivors with complete confidentiality: *"We lack a suitable setting for receiving*  
295 *victims of gender-based violence" (individual interview with health worker 5). The infrastructure*  
296 *is ill-suited to providing better care conditions for survivors of GBV. One-third of the patients*  
297 *(10/26) did not even have room to ensure the confidentiality and dignity of the survivors*  
298 *throughout the treatment.*

299 ☞ ***Low availability of care services***

300 The low availability of care services is linked to the quiet operational presence of care providers  
301 and the closure of health centers due to insecurity: "... *it is the very availability of the service, if*  
302 *the agents who are authorized to look after the person are not available, it is very complicated!*"  
303 (*Individual interview, case manager 4*). Moreover, the geographical coverage of care services is  
304 disparate due to the reduction in humanitarian space, which also impacts access to care services.

### 305 ☞ **Poor quality of care**

306 The individual interviews revealed that the poor behavior of certain staff in care services could be  
307 an obstacle to care: "*It is the obstacle linked to the quality of care. For example, if care does not*  
308 *go well, you have to understand that this can encourage other people not to come forward*"  
309 (*Individual interview with health worker 5*). These attitudes can affect the quality of care and  
310 even create secondary trauma for the victim. Two-thirds of the survivors felt that the services  
311 were not welcoming. Interview with a health worker: "Poor reception by health workers can lead  
312 a GBV survivor not to use our health services" (*Interview with a health worker 9*).

### 313 ☞ **Lack of cross-sector collaboration**

314 Collaboration between stakeholders is not always effective, even though it is imperative to  
315 respond adequately to the survivor's needs, as well as to mitigate the risks of GBV in other  
316 sectors, because the issue is cross-cutting: "*If the agent who provides the care does not*  
317 *collaborate with other services to find appropriate solutions to the needs of the victim of gender-*  
318 *based violence, it would be difficult*" (*Interview health agent 3*).

## 319 **Financial barriers**

320 At the health center level, an analysis of the narratives of health workers who care for GBV  
321 victims revealed that some of them believe that GBV victims do not always seek treatment  
322 because they think that the costs associated with their treatment and follow-up would be high and

323 that they could therefore not afford it: "*Many say that they cannot afford treatment and the*  
324 *procedures can be long to receive care. Maybe they do not know that if they came, we could help*  
325 *them*" (Individual interview with health agent 14).

326 Thus, a lack of financial means can be a barrier to treatment. Moreover, some victims are tempted  
327 to believe that cost has an additional impact on increasing the length of procedures and associated  
328 treatments. However, very few players (2/26) mentioned this possibility. Indeed, apart from  
329 financial support from United Nations agencies and international nongovernmental organizations  
330 (NGOs), the treatment of cases of gender-based violence (GBV), particularly cases of sexual  
331 violence requiring surgical repair, is not always free of charge. A medical certificate costs an  
332 average of five thousand (5,000) CFA francs.

### 333 **DISCUSSION**

334 This study has enabled us to gain a better understanding of the factors hindering access for  
335 survivors of GBV in the context of forced displacement. Indeed, an analysis of the management  
336 mechanism reveals that the obstacles are mainly at three levels. First, there is the victim's  
337 sociocultural environment and stereotypes. The sociocultural burden often forces victims to  
338 resign and not seek help [21]. Moreover, some obstacles are intrinsically linked to care services.  
339 The gap is more significant in a context marked by a shortage of qualified human resources, low  
340 expertise among care providers, poor availability and quality of services, and poor quack of  
341 credibility on the part of care services [7]. Finally, there is a cost of care, which is not always  
342 affordable for victims. The results closely reflect global data and findings from other  
343 humanitarian contexts [22]. In terms of sociocultural barriers, studies have shown that the reasons  
344 for not reporting gender-based violence (GBV) and refusing to seek help are generally linked to  
345 fear of social rejection, shame, ignorance, fear and the presence of the perpetrator in the victim's



346 living environment [23]. Stigmatization plays a crucial role in women's decision to seek help  
347 from GBV services [22]. Survivors are often ashamed and fearful of being rejected by society,  
348 especially when the perpetrator lives in their immediate environment. These attitudes prevent  
349 them from reporting GBV or seeking help. At the 57th session of the United Nations Economic  
350 and Social Council held in 2013, the program coordinator for victims of violence at Argentina's  
351 Ministry of Justice and Human Rights explained that despite the application of a very  
352 comprehensive law adopted in her country to eliminate violence against women, the latter still  
353 experienced fears of "reprisals" in the event of a complaint [24]. Care providers who are  
354 supposed to protect victims are also often alienated by stereotypes and preconceived ideas [25].  
355 For example, more than a majority of the care providers interviewed believe that women are  
356 responsible for the violence they suffer as a result of their behavior, and more than a third believe  
357 that men's insults to their wives are not GBV. Under these conditions, it seems clear that many of  
358 those involved in the care of survivors will not be able to help them put their problems into  
359 words, let alone avoid feeling guilty or condemning themselves. Unfortunately, victims construct  
360 their experiences through laws and social policies referred to by various institutions, such as  
361 family or community organizations [26]. In terms of institutional barriers, we note that healthcare  
362 providers generally have a low level of expertise in caring for victims of sexual and other forms  
363 of gender-based violence (GBV) [27]. In humanitarian contexts, survivors of GBV must receive  
364 prompt care. Although support services may be available, maximizing their benefits remains  
365 challenging [22]. The study showed that there is a real shortage of qualified human resources at  
366 all levels of care. Very few of those involved in care are trained.

367 Moreover, there is a high turnover rate due to the security situation. As a result, many trained  
368 professionals, particularly health workers, ask to be posted to other regions considered safer. This  
369 situation negatively impacts the quality of care, even if referrals are well made from the outset.

370 As a result, victims are often confronted with poor reception and inadequate care. The study  
371 revealed that most health workers are unaware of the treatment protocol in the event of rape.  
372 Some health workers do not know the priorities for treatment, care conditions, guidelines, or even  
373 the referral mechanism.

374 Similarly, psychologists are unaware of the different needs to be assessed in a survivor, let alone  
375 the dimensions of mental health and psychological support response [28]. In addition to needs  
376 assessment, the study revealed that GBV case managers do not master the steps involved in case  
377 management. Survivors also pointed to a lack of professionalism by those involved. Most  
378 survivors did not appreciate how they received care services. Some even questioned the lack of  
379 respect for confidentiality, one of the guiding principles of the services provided. The study also  
380 revealed that the closure of health facilities due to growing insecurity hinders access to care and  
381 makes it difficult to gather feedback information to guide decision-making [27].

382 Health services are the main gateway for survivors to receive care services. This healthcare  
383 system failure can result in less access to sexual and reproductive health (SRH) services, social  
384 services and justice [4]. Even the services available are not all easily accessible (physical  
385 accessibility). More than one-third of the survivors interviewed mentioned this difficulty. We  
386 also note that, even when the service exists, the availability of confidential spaces and qualified  
387 male and female staff is only sometimes a reality. The poor behavior of certain care providers  
388 was also identified as an obstacle to care. Inadequate communication about the presence of care  
389 services could also explain survivors' difficulties accessing such services. None of the care  
390 providers mentioned their responsibility to respect the principle of confidentiality or their  
391 obligation to communicate that services are free. All these factors constitute obstacles to  
392 accessing services and contribute to lengthening the time it takes to receive care.

393 A lack of financial resources is another barrier to treatment. Indeed, treatment is not always free  
394 of charge. In addition, this financial barrier, which delays treatment, can render it ineffective in  
395 certain situations, notably in cases of rape, where prophylaxis for acquired immunodeficiency  
396 virus (HIV) must imperatively be carried out within 72 hours of the act of rape [29]. A small  
397 number of respondents recognized financial barriers because of the availability of subsidized care  
398 by the government and international organizations in the studied healthcare facilities, allowing  
399 the reduction of finances as a strong barrier for survivor care. Moreover, the cost of services, if  
400 not free, must be accessible to all survivors of GBV [30].

401 This study has several limitations. Reporting bias may be linked to the subject's sensitivity,  
402 leading some actors to underreport by refraining from mentioning certain sensitive or hurtful  
403 aspects [31]. However, mobilizing all stakeholders in the fight against GBV is difficult without  
404 conclusive data and scientific evidence [32]. Hence, the scientific interest in this topic is high.

## 405 **CONCLUSION**

406 We have demonstrated that obstacles to adequate, holistic care for GBV survivors are linked to  
407 organizational dysfunctions and sociocultural constraints. However, without effective  
408 coordination, it will be easier to respond holistically to the needs of GBV survivors. This is why  
409 we need to raise awareness of vulnerable groups of GBV victims and develop integrated care  
410 centers. The aim is to make the full range of management activities available in one location with  
411 funds. This has the advantage of facilitating access to services and enhancing the quality of care  
412 thanks to a well-coordinated response.

413

414

415

416

417

418

## 419 **REFERENCES**

420 [1] Figures at a glance. UNHCR n.d. <https://www.unhcr.org/about-unhcr/who-we-are/figures-glance>  
421 (accessed January 10, 2024).

422 [2] Cluster Protection. Stratégie Cluster Protection Burkina Faso 2021.

423 [3] ONU Femmes. Foire aux questions : Formes de violence à l'égard des femmes et des filles 2022.

424 [4] UNFPA. Normes minimales interorganisations pour la programmation d'actions de lutte contre la  
425 violence basée sur le genre dans les situations d'urgence 2019.

426 [5] Keen E, Pande A-R, Grzemny D. Questions de genre: Manuel pour aborder la violence fondée sur le  
427 genre affectant les jeunes. Conseil de l'Europe; 2021. <https://doi.org/10.3917/coe.pande.2019.01>.

428 [6] Care International. Relever les défis des VBG dans le monde: l'impact des programmes menés par  
429 CARE. 2013.

430 [7] UNFPA, World Education. Guide d'accompagnement de la formation en ligne Prise en charge de la  
431 violence basée sur le genre dans les situations d'urgence 2016.

432 [8] IASC. Comment soutenir les survivants de violences basées sur le genre lorsqu'aucun acteur  
433 spécialisé en la matière n'est disponible dans votre secteur 2019.

434 [9] Cluster Protection. Besoin de renforcer la protection des civils dans la région du Centre-Nord. 2022.

435 [10] Comité permanent interorganisations. Directives pour l'intégration d'interventions ciblant la violence  
436 basée sur le genre dans l'action humanitaire Genève, CPI 2015.

437 [11] CONASUR. Enregistrement des personnes déplacées internes du Burkina Faso 2023.

- 438 [12]Département de la sûreté et de la sécurité de l'ONU (UNDSS). Briefing note du Département de la  
439 sûreté et de la sécurité de l'ONU (UNDSS) à Kaya. Kaya: 2022.
- 440 [13]CONASUR. Enregistrement des Personnes Déplacées Internes du Burkina Faso 2022.
- 441 [14]Sous cluster VBG. Rapport annuel du domaine de responsabilité VBG du Centre-Nord (Burkina  
442 Faso). 2022.
- 443 [15]Sous cluster VBG. Rapport annuel. Centre-Nord: 2021.
- 444 [16]Fonds des Nations Unies pour la Population (UNFPA). Plan d'action humanitaire 2022-2023 de  
445 l'UNFPA au Burkina Faso 2022.
- 446 [17]Phillimore J, Pertek S, Akyuz S, Darkal H, Hourani J, McKnight P, et al. "We are Forgotten": Forced  
447 Migration, Sexual and Gender-Based Violence, and Coronavirus Disease-2019. *Violence Women*  
448 2022;28:2204–30. <https://doi.org/10.1177/10778012211030943>.
- 449 [18]Braun V, Clarke V. Using thematic analysis in psychology. *Qual Res Psychol* 2006;3:77–101.  
450 <https://doi.org/10.1191/1478088706qp063oa>.
- 451 [19]Restivo L, Julian-Reynier C, Apostolidis T. Pratiquer l'analyse interprétative phénoménologique :  
452 intérêts et illustration dans le cadre de l'enquête psychosociale par entretiens de recherche. *Prat*  
453 *Psychol* 2018;24:427–49. <https://doi.org/10.1016/j.prps.2017.12.001>.
- 454 [20]Boucher-Gagnon M, Des Rivières-Pigeon C. Le point de vue de mères sur l'expérience d'intégration  
455 scolaire de leur enfant présentant un trouble du spectre de l'autisme□: rôle des services et de  
456 l'environnement scolaire. *Rev Sci L'éducation* 2016;41:353–84. <https://doi.org/10.7202/1035309ar>.
- 457 [21]Koudou O, Crizoa H, De Serifou M. Déterminants des obstacles à la prise en charge des femmes  
458 victimes de viol à Abidjan: *Sci Actions Soc* 2019;N° 11:123–38.  
459 <https://doi.org/10.3917/sas.011.0123>.
- 460 [22]Muuo S, Muthuri SK, Mutua MK, McAlpine A, Bacchus LJ, Ogego H, et al. Barriers and facilitators  
461 to care-seeking among survivors of gender-based violence in the Dadaab refugee complex. *Sex*  
462 *Reprod Health Matters* 2020;28:1722404. <https://doi.org/10.1080/26410397.2020.1722404>.
- 463 [23]Nasr R. Les violences conjugales: étude comparative entre Liban, France et Canada n.d.

- 464 [24] Nations Unies. Des obstacles importants entravent les efforts de prévention de la violence à l'encontre  
465 des femmes et des filles en Afrique, soulignent de nombreux ministres 2013.
- 466 [25] ONU Femmes. Éléments essentiels de la programmation, Suivi & Evaluation/Principaux obstacles  
467 2010.
- 468 [26] Flynn C, Damant D, Bernard J. Analyser la violence structurelle faite aux femmes à partir d'une  
469 perspective féministe intersectionnelle. *Nouv Prat Soc* 2015;26:28–43.  
470 <https://doi.org/10.7202/1029260ar>.
- 471 [27] UNFPA. Rapport de situation humanitaire au Centre-Nord (Burkina Faso). 2021.
- 472 [28] Sous cluster VBG. Procédures Opérationnelles Standards (POS) pour la prévention et la réponse aux  
473 Violence Basée sur le Genre dans la région du Centre Nord 2021:72.
- 474 [29] UNFPA. Briefing note sur la situation des VBG dans les régions humanitaires au Burkina Faso 2021.
- 475 [30] Organization Mondiale de la Santé (OMS), Haut-Commissariat pour les Réfugiés (UNHCR). Gestion  
476 clinique des victimes de viol: développement de protocole adopté avec les réfugiés et les personnes  
477 déplacées dans leur propre pays. 2005.
- 478 [31] Marie-Hélène Gervais, Buetti D. Femmes immigrantes et intersectionnalité: enjeux méthodologiques  
479 pour la recherche en santé au Canada 2016.
- 480 [32] Keen E, Pande A-R, Grzemny D. Questions de genre: Manuel pour aborder la violence fondée sur le  
481 genre affectant les jeunes. Conseil de l'Europe; 2021. <https://doi.org/10.3917/coe.pande.2019.01>.  
482
